# Supplementary material for: A New Duplex Recombinase Polymerase Amplification (D-RPA) Method for the Simultaneous and Rapid Detection of Shigella and Bacillus cereus in Food
Source: MDPI journal article supplement (doi:10.3390/foods12091889), 2023-05-04
Supplement: s1 [file s1]

## Supplementary Materials

**Table S1.** All primer sequences.

| Primer Name                        |                  | Sequence (5'→3')       | Product size (bp) | Reference  |
|------------------------------------|------------------|------------------------|-------------------|------------|
| 16S rDNA universal primer sequence | 27-F             | AGAGTTTGATCCTGGCTCAG   | 1516              | [1]        |
|                                    | 1429-R           | TACGGCTACCTTGTTACGACTT |                   |            |
| RPA candidate primer sequence      | <i>Shigella</i>  | <i>ipaH</i> -1F        | 213               | This study |
|                                    |                  | <i>ipaH</i> -1R        |                   |            |
|                                    |                  | <i>ipaH</i> -2F        | 237               |            |
|                                    |                  | <i>ipaH</i> -2R        |                   |            |
|                                    |                  | <i>ipaH</i> -3F        | 137               |            |
|                                    |                  | <i>ipaH</i> -3R        |                   |            |
|                                    | <i>B. cereus</i> | <i>nheA</i> -1F        | 252               |            |
|                                    |                  | <i>nheA</i> -1R        |                   |            |
|                                    |                  | <i>nheA</i> -2F        | 341               |            |
|                                    |                  | <i>nheA</i> -2R        |                   |            |
|                                    |                  | <i>nheA</i> -3F        | 161               |            |
|                                    |                  | <i>nheA</i> -3R        |                   |            |
|                                    |                  | <i>nheB</i> -1F        | 174               |            |
|                                    |                  | <i>nheB</i> -1R        |                   |            |
|                                    |                  | <i>nheB</i> -2F        | 312               |            |
|                                    |                  | <i>nheB</i> -2R        |                   |            |
|                                    |                  | <i>nheB</i> -3F        | 361               |            |
|                                    |                  | <i>nheB</i> -3R        |                   |            |
| <i>Shigella</i>                    | <i>ipaH</i> -F   | 629                    | [2]               |            |
|                                    | <i>ipaH</i> -R   |                        |                   |            |
|                                    | <i>B. cereus</i> | <i>nheB</i> -F         | 770               | [3]        |
|                                    |                  | <i>nheB</i> -R         |                   |            |

Note: F, forward primer; R, reverse primer.

**Table S2.** Gray analysis of electrophoretic bands of reaction time optimization results of the D-RPA reaction system.

| Lanes | Peak area of <i>Shigella</i> | Peak area of <i>Bacillus cereus</i> |
|-------|------------------------------|-------------------------------------|
| 1     | 934.698                      | 553.456                             |
| 2     | 1017.113                     | 549.213                             |
| 3     | 4355.477                     | 3071.698                            |
| 4     | 4346.598                     | 3168.941                            |
| 5     | 6006.477                     | 4607.113                            |
| 6     | 7550.184                     | 5377.941                            |
| 7     | 10617.184                    | 7623.941                            |
| 8     | 11040.305                    | 7851.82                             |
| 9     | 9429.77                      | 11998.355                           |
| 10    | 7851.477                     | 11691.355                           |
| 11    | 7669.062                     | 11388.062                           |
| 12    | 7616.012                     | 11522.82                            |

**Table S3.** Gray analysis of electrophoretic bands of reaction temperature optimization results of the D-RPA reaction system.

| Lanes | Peak area of <i>Shigella</i> | Peak area of <i>Bacillus cereus</i> |
|-------|------------------------------|-------------------------------------|
| 1     | 2862.062                     | 488.799                             |
| 2     | 2565.82                      | 453.556                             |
| 3     | 4364.355                     | 1248.284                            |
| 4     | 4963.941                     | 1464.577                            |
| 5     | 9000.305                     | 3940.82                             |
| 6     | 9163.77                      | 4026.113                            |
| 7     | 8791.355                     | 4599.698                            |
| 8     | 7527.648                     | 3614.698                            |
| 9     | 9222.062                     | 10537.477                           |
| 10    | 9648.477                     | 11029.527                           |
| 11    | 5670.234                     | 10209.234                           |
| 12    | 5132.82                      | 9954.82                             |

**Table S4.** Gray analysis of electrophoretic bands of Mg<sup>2+</sup> concentration optimization results of the D-RPA reaction system.

| Lanes | Peak area of <i>Shigella</i> | Peak area of <i>Bacillus cereus</i> |
|-------|------------------------------|-------------------------------------|
| 1     | 8687.548                     | 363.385                             |
| 2     | 9489.598                     | 390.749                             |
| 3     | 9664.355                     | 5362.355                            |
| 4     | 9933.184                     | 5340.648                            |
| 5     | 9398.062                     | 6948.234                            |
| 6     | 9720.062                     | 7266.355                            |
| 7     | 9060.941                     | 7819.941                            |
| 8     | 9889.598                     | 8218.062                            |
| 9     | 9896.184                     | 8738.234                            |
| 10    | 9665.062                     | 8771.477                            |
| 11    | 8824.891                     | 6360.234                            |
| 12    | 8423.225                     | 6651.719                            |

**Table S5.** Gray analysis of electrophoretic bands of sensitivity verification results of the D-RPA reaction system.

| Lanes | Peak area of <i>Shigella</i> | Peak area of <i>Bacillus cereus</i> |
|-------|------------------------------|-------------------------------------|
| 1     | 15572.962                    | 10196.962                           |
| 2     | 16263.669                    | 10784.134                           |
| 3     | 14077.326                    | 4341.426                            |
| 4     | 13868.912                    | 4125.012                            |
| 5     | 6751.669                     | 1862.648                            |
| 6     | 4870.255                     | 1318.698                            |
| 7     | 5770.962                     |                                     |
| 8     | 5561.255                     |                                     |

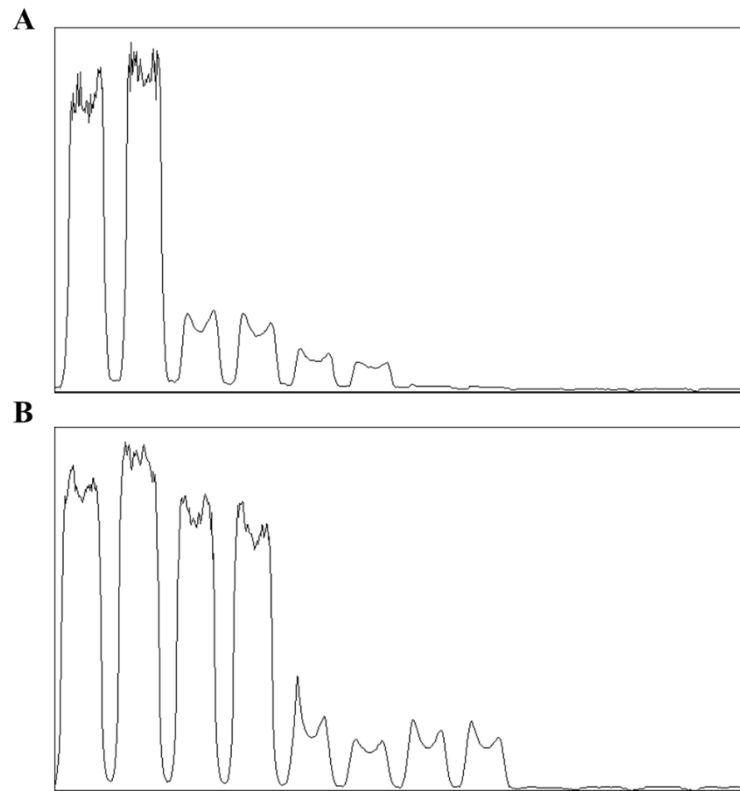

**Figure S1.** Results of the sensitivity validation of the D-RPA reaction system with grayscale analysis of the electrophoretic bands. (A) *Bacillus cereus*; (B) *Shigella*.

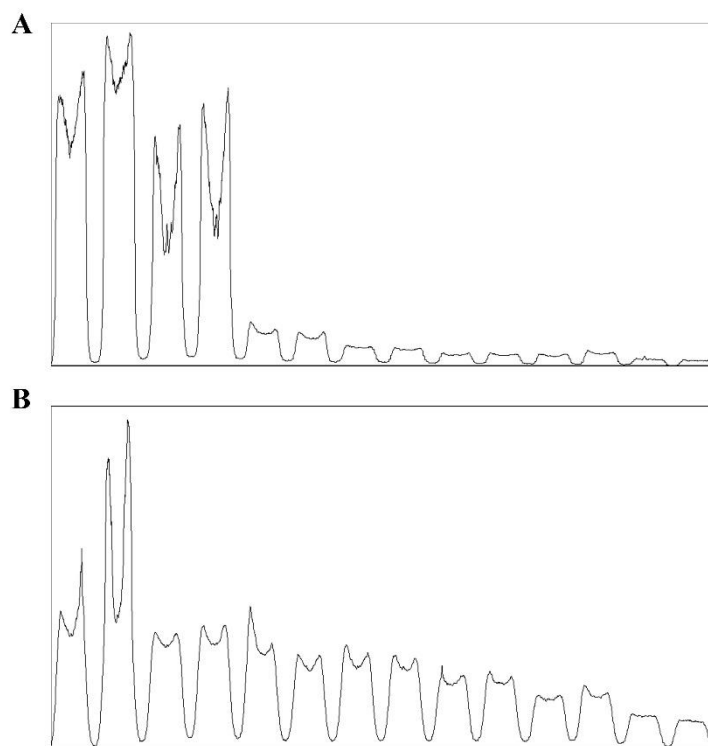

**Figure S2.** Results of the D-RPA reaction system in actual samples with grayscale analysis of the electrophoretic bands. (A) *Bacillus cereus*; (B) *Shigella*.

## Reference

1. Frank, J.A.; Reich, C.I.; Sharma, S.; Weisbaum, J.S.; Wilson, B.A.; Olsen, G.J. Critical evaluation of two primers commonly used for amplification of bacterial 16S rRNA genes. *Appl. Environ. Microbiol.* **2008**, *74*, 2461-2470.
2. General Administration of Quality Supervision, Inspection and Quarantine of the People's Republic of China. Rapid detection of many pathogenic bacteria in food PCR method. **2007**, *SN/T 1869-2007*, 15P;A14.
3. Hansen, B.M.; Hendriksen, N.B. Detection of enterotoxigenic *Bacillus cereus* and *Bacillus thuringiensis* strains by PCR analysis. *Appl. Environ. Microbiol.* **2001**, *67*, 185-189.
